# *Wolbachia*-infected *Drosophila* prefer cooler temperatures

Pieter A. Arnold<sup>\*,†,a</sup>, Samantha Levin<sup>‡</sup>, Aleksej L. Stevanovic, Karyn N. Johnson<sup>b</sup>

School of Biological Sciences, The University of Queensland, Brisbane QLD 4072, Australia

<sup>†</sup> Present address: Research School of Biology, The Australian National University, Acton ACT 2601, Australia

<sup>‡</sup> Present address: School of Biomedical Sciences, The University of Queensland, Brisbane QLD 4072, Australia

<sup>a</sup> ORCID: 0000-0002-6158-7752

<sup>b</sup> ORCID: 0000-0001-8647-8985

\* Corresponding author: Pieter A. Arnold

Email: [pieter.arnold@anu.edu.au](mailto:pieter.arnold@anu.edu.au)

Address: Research School of Biology, 46 Sullivans Creek Road, The Australian National University, Acton ACT 2601, Australia

## Abstract

Temperature plays a fundamental role in host-pathogen interactions. *Wolbachia* is an endosymbiont that infects about 40% of arthropod species, which can affect host behaviour and reproduction. The effect of *Wolbachia* on host thermoregulatory behaviour is largely unknown. Here, we used a thermal gradient to test whether *Drosophila melanogaster* infected with *Wolbachia* exhibit different temperature preferences ( $T_p$ ) to uninfected flies. We found that *Wolbachia*-infected flies preferred a cooler mean temperature ( $T_p = 25.06 \pm 0.25^\circ\text{C}$ ) than uninfected flies ( $T_p = 25.78 \pm 0.24^\circ\text{C}$ ). Our finding suggests that *Wolbachia*-infected hosts might seek out cooler microclimates to reduce exposure to and lessen the consequences of high temperatures.

**Keywords:** *Drosophila melanogaster*; host-pathogen interaction; temperature preference; thermal gradient; wMelCS; *Wolbachia pipientis*

## Abbreviations:

$T_b$  : body temperature

$T_p$  : preferred temperature

# 1. Introduction

*Wolbachia pipientis* is an endosymbiont bacteria that infects an estimated 40% of terrestrial arthropod species (Zug and Hammerstein, 2012). The association between *Wolbachia* and its hosts has been the subject of a wide array of studies, including the alteration of host behaviours and reproduction (Panteleev et al., 2007; Vala et al., 2004; van Houte et al., 2013; Weeks et al., 2002), cytoplasmic incompatibility for disease vector control (Clancy and Hoffmann, 1998; Mouton et al., 2005), and environmental factors mediating host-pathogen interactions (Murdock et al., 2012). Temperature is a key environmental modulator of host-pathogen interactions, which constrains the rate of biological reactions and sets limits to performance and survival (Thomas and Blanford, 2003).

For the insect host, there is little physiological capacity to differentiate their body temperature ( $T_b$ ) from the ambient temperature of their surrounding environment (Angilletta, 2009). Physiological rates and performance are strongly affected by  $T_b$  in ectotherms, so organisms should aim to maintain their  $T_b$  across a range of temperatures that correspond to adequate performance (Huey and Kingsolver, 1989; Sinclair et al., 2016). One strategy that ectotherms can employ to avoid exposure to unsuitable temperatures is to modify their behaviour to seek more suitable microclimates, such as in shade, to find their preferred temperature ( $T_p$ ) (Sunday et al., 2014). Temperature preference is the perception and neural integration of thermal information, resulting in this crucial thermoregulatory behaviour (Abram et al., 2017). *D. melanogaster* exhibits strong circadian and neutrally controlled temperature preference behaviour, which centres around 24–27°C (Arnold et al., 2015; Kaneko et al., 2012; Sayeed and Benzer, 1996).

Less is known about the thermal biology of *Wolbachia*, however high temperatures appear to be unfavourable. *Wolbachia* density is much higher at lower temperatures (e.g.,

13–19°C (Moghadam et al., 2017)) and is reduced at higher temperatures (e.g., 26°C (Clancy and Hoffmann, 1998; Hurst et al., 2000)). *Wolbachia* can be mostly or completely eliminated by exposure to cyclic heat stress or temperatures above 30°C, which also reduces vertical transmission of the symbiont (Corbin et al., 2016; Ross et al., 2017).

As temperatures ideally suited to *D. melanogaster* are generally higher than those suited to *Wolbachia*, we predict that manipulating their host's behaviour to seek cooler temperatures would be beneficial. Thus, our objective here is to use an established behavioural assay to test the capacity for *Wolbachia* infection to alter host  $T_p$ .

## 2. Methods

### 2.1 Fly and *Wolbachia* lines

*Drosophila melanogaster* from the Oregon RC line were infected with the wMelCS line of *Wolbachia pipientis* (hereafter +*Wol*). All flies were reared in 25°C incubators on a standard cornmeal diet and 12 h light/dark cycle. The control (*Wolbachia*-free) fly line was generated from the wMelCS-infected line by treating flies with 0.03% tetracycline. These flies were reared on a standard cornmeal diet for at least five generations before use to recover after tetracycline treatment. Male flies were used exclusively in temperature preference assays but both males and females are known to exhibit similar temperature preferences (Sayeed and Benzer, 1996).

### 2.2 Temperature preference assays

Temperature preference assays used an identical thermal gradient apparatus to that previously described in (Arnold et al., 2015). The apparatus achieved a stable linear gradient of 0.2°C per cm across a temperature range of 17.5–33.5°C (Arnold et al., 2015).

Temperatures were measured throughout the experiment by five K-type thermocouples suspended in the gradient airspace, held by bungs that were fitted into an acrylic cover, recorded by a Squirrel 2040 temperature meter.

Five flies were gently tipped into the centre of the apparatus allowed to freely move about the apparatus for 30 minutes. At the end of the trial period, flies were anaesthetised by CO<sub>2</sub> that was introduced into both ends of the gradient at a low-flow rate to prevent changes to the position of flies. Distance along the gradient was then used to determine the preferred temperature at the position of rest for each fly in the gradient,  $T_p$ .

As circadian rhythm affects  $T_p$  in *Drosophila*, we always conducted temperature preference assays between 09:30 and 13:30, a time period across which  $T_p$  is stable (Kaneko et al., 2012). Assays were also conducted in darkness by covering the apparatus in black material to prevent phototactic behaviour affecting positioning (Dillon et al., 2009).

### 2.3 Statistical analyses

To determine whether presence or absence of *Wolbachia* affected  $T_p$ , we applied Welch's two-sample *t*-test to compare the preferred temperatures of control and +*Wol* flies. We then calculated Cohen's *d* with 95% confidence intervals (CIs) as a measure of effect size, given that *p* is not always robust (Halsey et al., 2015). All analyses were conducted in R v3.4.1 (R Development Core Team, 2017).

## 3. Results and discussion

We found that flies infected with *Wolbachia* preferred cooler temperatures compared to those without any *Wolbachia* (Fig. 1). The difference between populations was significant at  $\alpha = 0.05$  ( $t_{1,114} = 2.123$ ,  $p = 0.036$ ), which was supported by an effect size and 95% CIs that

did not overlap with zero (Cohen's  $d = 0.394$  [ $0.189 - 0.563$ ]). Both populations exhibited large variance in  $T_p$ , ranging between 18.5 and 29°C (Fig. 1A). There is some overlap in  $T_p$  distributions between the populations (Fig. 1B). In absolute terms, +*Wol* flies preferred a cooler mean ( $\pm$  SE) temperature of  $25.06 \pm 0.25^\circ\text{C}$  compared to the control flies which preferred  $25.78 \pm 0.24^\circ\text{C}$ .

To the best of our knowledge, this is the first empirical account of *Wolbachia*-infected flies exhibiting a preference for cooler temperatures. This finding is a strong indication that *Wolbachia* can manipulate an important aspect of host thermoregulatory behaviour.

Pathogens can improve their transmission probability and reproductive capacity by inducing host behavioural changes (Lefèvre and Thomas, 2008). Changes in thermoregulation behaviour has been well studied from the perspective of the infected host, particularly behavioural fever, where the host elevates its  $T_b$  by behavioural means to rid itself of the pathogen (Kluger, 1979). However, it is less clear whether pathogens manipulate host  $T_p$ , especially when the pathogen is not parasitic (i.e., endosymbionts or mutualisms) and for decreases to  $T_p$ . *Wolbachia* infects a highly diverse array of arthropod hosts and often has different  $T_p$  and temperature limits to that of its host (e.g., Pintureau and Bolland, 2001).

Variance of temperatures in nature may lead to populations with mixed or incomplete *Wolbachia* infection (Van Opijnen and Breeuwer, 1999), but it is possible that *Wolbachia* could manipulate host  $T_p$  to maximise its own fitness without negatively affecting the host. Cyclic heat stress fluctuating between 26°C and 37°C at 12 h intervals significantly reduced *Wolbachia* density and cytoplasmic incompatibility of wMel and wMelPop-CLA, but not wAlb in *Aedes aegypti* (Ross et al., 2017). Thermal biology will likely differ among strains of both host and pathogen, and the strain-specificity of  $T_p$  is important for future studies to consider.

The wMelCS strain used in the present study likely shares a recent field origin with wMel (Riegler et al., 2005), a widely used dengue-suppressing *Wolbachia* strain. Temperature fluctuations like the cyclic heat stress experiment might well be experienced naturally in tropical regions. This would likely result in incomplete infection, which could explain the erratic temporal and spatial dynamics of *Wolbachia* spread in controlled infected-vector release programs (e.g., Schmidt et al., 2017). Our finding suggests that *Wolbachia*-infected hosts prefer cooler temperatures and might be likely to seek out cooler microclimates, which would reduce exposure to and lessen the fitness consequences of high temperatures.

The absolute decrease in  $T_p$  of less than 1°C that we observed in flies infected with *Wolbachia* provides little buffer to the predicted 2–4°C increase by 2100 due to climate change (IPCC, 2014). However, *Wolbachia* are maternally inherited and exposure to high temperatures can reduce vertical transmission in only a few generations (Corbin et al., 2016). If the infected host prefers cooler temperatures, then this behaviour would confer a selective advantage for *Wolbachia*. Arthropod hosts of *Wolbachia* have rapid generation times relative to the forecast rate of temperature increase, therefore it is conceivable that a minor change in  $T_p$  could be enhanced by selection across generations to mitigate fitness consequences.

This study paves the way for discovering the mechanisms by which *Wolbachia* infection alters host  $T_p$ . Whether the observed phenomenon is due to *Wolbachia* directly manipulating host behaviour, a host defense response, or a by-product of infection will need to be determined. The efficacy of introductions of populations of *Wolbachia*-infected vectors may hinge upon a better understanding of complex host-pathogen-environment interactions. Testing for *Wolbachia*-induced changes in thermal preference across multiple host and pathogen strains will elucidate whether unexpected ecological and evolutionary responses might occur in planned vector releases in a changing climate.

## 154    **Funding**

155    This research did not receive any specific grant from funding agencies in the public,  
156    commercial, or not-for-profit sectors.

157

## 158    **Acknowledgements**

159    We thank Prof Craig White for provision of laboratory space and equipment for this study.



# Figure

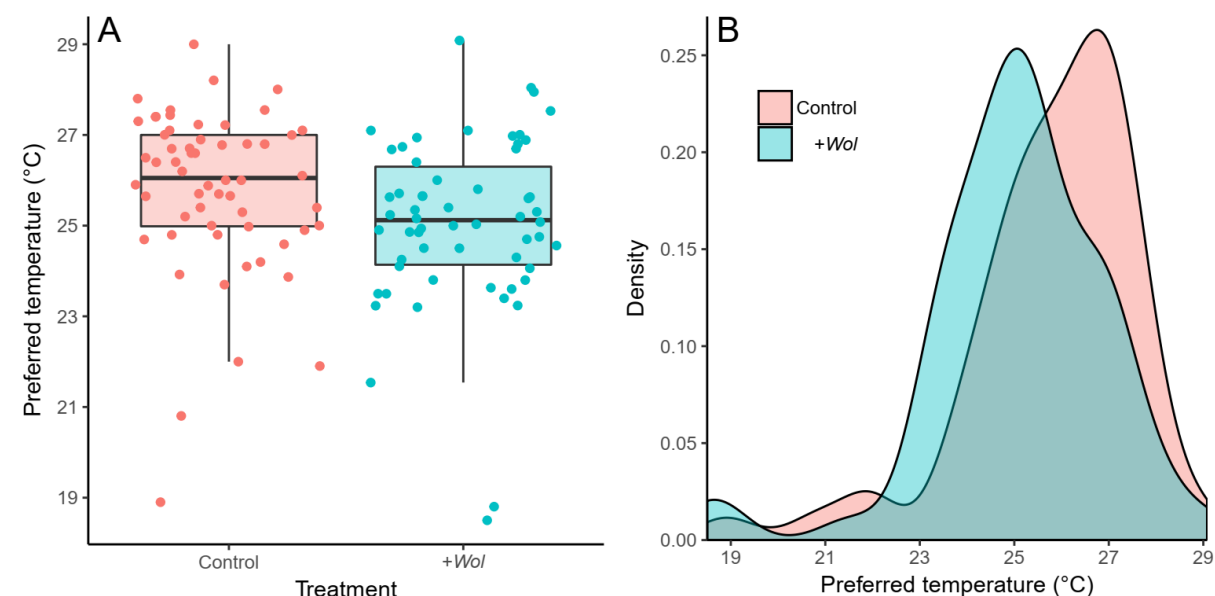

**Figure 1. Preferred temperature of control and +Wol *Drosophila melanogaster*.** (A) Boxplot of preferred temperature including raw data points for control and +Wol flies. Each population had  $n = 58$  individuals. (B) Density plot showing smoothed distributions of the preferred temperature data for each population.

## 4. References

- Abram, P. K., et al., 2017. Behavioural effects of temperature on ectothermic animals: unifying thermal physiology and behavioural plasticity. *Biol. Rev.* 92, 1859-1876.
- Angilletta, M. J., 2009. Thermal adaptation: a theoretical and empirical synthesis. Oxford University Press, New York.
- Arnold, P. A., et al., 2015. *Drosophila melanogaster* does not exhibit a behavioural fever response when infected with *Drosophila* C virus. *J. Gen. Virol.* 96, 3667-3671.
- Clancy, D. J., Hoffmann, A. A., 1998. Environmental effects on cytoplasmic incompatibility and bacterial load in *Wolbachia*-infected *Drosophila simulans*. *Entomol. Exp. Appl.* 86, 13-24.
- Corbin, C., et al., 2016. Heritable symbionts in a world of varying temperature. *Heredity.* 118, 10-20.
- Dillon, M. E., et al., 2009. Review: thermal preference in *Drosophila*. *J. Therm. Biol.* 34, 109-119.
- Halsey, L. G., et al., 2015. The fickle P value generates irreproducible results. *Nat. Methods.* 12, 179-185.
- Huey, R. B., Kingsolver, J. G., 1989. Evolution of thermal sensitivity of ectotherm performance. *Trends Ecol. Evol.* 4, 131-135.
- Hurst, G. D. D., et al., 2000. Male-killing *Wolbachia* in *Drosophila*: a temperature-sensitive trait with a threshold bacterial density. *Genetics.* 156, 699-709.

187 IPCC, 2014. IPCC Fifth Assessment Report. Cambridge University Press.

188 Kaneko, H., et al., 2012. Circadian rhythm of temperature preference and its neural control  
189 in *Drosophila*. Curr. Biol. 22, 1851-1857.

190 Kluger, M. J., 1979. Fever in ectotherms: evolutionary implications. Am. Zool. 19, 295-304.

191 Lefèvre, T., Thomas, F., 2008. Behind the scene, something else is pulling the strings:  
192 emphasizing parasitic manipulation in vector-borne diseases. Infect. Genet. Evol. 8,  
193 504-519.

194 Moghadam, N. N., et al., 2017. Strong responses of *Drosophila melanogaster* microbiota to  
195 developmental temperature. Fly. 1-12.

196 Mouton, L., et al., 2005. Effect of temperature on *Wolbachia* density and impact on  
197 cytoplasmic incompatibility. Parasitology. 132, 49-56.

198 Murdock, C. C., et al., 2012. Rethinking vector immunology: the role of environmental  
199 temperature in shaping resistance. Nat. Rev. Microbiol. 10, 869-876.

200 Panteleev, D. Y., et al., 2007. The endosymbiotic bacterium *Wolbachia* enhances the  
201 nonspecific resistance to insect pathogens and alters behavior of *Drosophila*  
202 *melanogaster*. Russ. J. Genet. 43, 1066-1069.

203 Pintureauand, B., Bolland, P., 2001. A *Trichogramma* species showing a better adaptation to  
204 high temperature than its symbionts. Biocontrol Sci. Techn. 11, 13-20.

205 R Development Core Team, 2017. R: a language and environment for statistical computing.  
206 R Foundation for Statistical Computing. Vienna, Austria.

207 Riegler, M., et al., 2005. Evidence for a global *Wolbachia* replacement in *Drosophila*  
208 *melanogaster*. Curr. Biol. 15, 1428-1433.

209 Ross, P. A., et al., 2017. *Wolbachia* infections in *Aedes aegypti* differ markedly in their  
210 response to cyclical heat stress. PLoS Pathog. 13, e1006006.

211 Sayeed, O., Benzer, S., 1996. Behavioral genetics of thermosensation and hygrosensation in  
212 *Drosophila*. Proc. Natl. Acad. Sci. U.S.A. 93, 6079-6084.

213 Schmidt, T. L., et al., 2017. Local introduction and heterogeneous spatial spread of dengue-  
214 suppressing *Wolbachia* through an urban population of *Aedes aegypti*. PLoS Biol. 15,  
215 e2001894.

216 Sinclair, B. J., et al., 2016. Can we predict ectotherm responses to climate change using  
217 thermal performance curves and body temperatures? Ecol. Lett. 19, 1372-1385.

218 Sunday, J. M., et al., 2014. Thermal-safety margins and the necessity of thermoregulatory  
219 behavior across latitude and elevation. Proc. Natl. Acad. Sci. U.S.A. 111, 5610-5615.

220 Thomas, M. B., Blanford, S., 2003. Thermal biology in insect-parasite interactions. Trends  
221 Ecol. Evol. 18, 344-350.

222 Vala, F., et al., 2004. *Wolbachia* affects oviposition and mating behaviour of its spider mite  
223 host. J. Evol. Biol. 17, 692-700.

224 van Houte, S., et al., 2013. Walking with insects: molecular mechanisms behind parasitic  
225 manipulation of host behaviour. Mol. Ecol. 22, 3458-3475.

- 226 Van Opijnen, T., Breeuwer, J. A. J., 1999. High temperatures eliminate *Wolbachia*, a  
 227 cytoplasmic incompatibility inducing endosymbiont, from the two-spotted spider  
 228 mite. Exp. Appl. Acarol. 23, 871-881.
- 229 Weeks, A. R., et al., 2002. *Wolbachia* dynamics and host effects: what has (and has not)  
 230 been demonstrated? Trends Ecol. Evol. 17, 257-262.
- 231 Zug, R., Hammerstein, P., 2012. Still a host of hosts for *Wolbachia*: analysis of recent data  
 232 suggests that 40% of terrestrial Arthropod species are infected. PLoS One. 7, e38544.  
 233
